# Supplementary material
Source: PubMed Central journal article supplement (PMC3408085)
Supplement: supp_mss077_MSS077_Varki12-935SupplementaryFigures.pdf [file supp_mss077_MSS077_Varki12-935SupplementaryFigures.pdf]

Figure S1 Wang et al.

|               |     |                                                    |     |
|---------------|-----|----------------------------------------------------|-----|
| HsaSIGLEC11   | 1   | AATGAATGAATGAATGAGACTCTGCATCCATCACCTCACCTGCAGCCGTG | 50  |
| PtrSIGLEC11   | 1   | .....G.....T...                                    | 50  |
| HsaSIGLEC16   | 1   | .....G.....A..                                     | 50  |
| HsaSIGLEC16P  | 1   | .....G.....T.....A..                               | 50  |
| PtrSIGLEC16   | 1   | .....A..                                           | 50  |
| ↓ AA'1        |     |                                                    |     |
| HsaSIGLEC11   | 50  | ACTCACCTGTGTCCCCTGACAGTCCCCTCCTAGCACTGCCACCTCCGAG  | 100 |
| PtrSIGLEC11   | 50  | .....A..                                           | 100 |
| HsaSIGLEC16   | 50  | .....                                              | 100 |
| HsaSIGLEC16P  | 50  | .....                                              | 100 |
| PtrSIGLEC16   | 50  | .....                                              | 100 |
| HsaSIGLEC11   | 100 | GCTGGCCAGGGTGGCTCCTTCCTGGTTTGGGGCTGGTCCTCATGCCCTCT | 150 |
| PtrSIGLEC11   | 100 | .....A.....                                        | 150 |
| HsaSIGLEC16   | 100 | .....                                              | 150 |
| HsaSIGLEC16P  | 100 | .....                                              | 150 |
| PtrSIGLEC16   | 100 | .....                                              | 150 |
| HsaSIGLEC11   | 150 | GCCCTGCTGCTTCCCCTGTGAAAGGAGAAGTTGGAAGCGAGCTTTCAGG  | 200 |
| PtrSIGLEC11   | 150 | .....GA.....G.....                                 | 200 |
| HsaSIGLEC16   | 150 | .....G.....                                        | 200 |
| HsaSIGLEC16P  | 150 | .....G.....                                        | 200 |
| PtrSIGLEC16   | 150 | .....G.....                                        | 200 |
| <u>Exon 1</u> |     |                                                    |     |
| HsaSIGLEC11   | 200 | ACATAGCGGTTCCCGAGGCTCCTCCTCTGTGGATGGTCACTGCCCTCCA  | 250 |
| PtrSIGLEC11   | 200 | .....C.....                                        | 250 |
| HsaSIGLEC16   | 200 | .....                                              | 250 |
| HsaSIGLEC16P  | 200 | ...T.....                                          | 250 |
| PtrSIGLEC16   | 200 | .....C.....                                        | 250 |
| HsaSIGLEC11   | 250 | CCAGGCTTCTGCTGGAGGAGTTTCTTCCCAGCCAGGCCGGCCAGAAG    | 300 |
| PtrSIGLEC11   | 250 | .....T.....                                        | 300 |
| HsaSIGLEC16   | 250 | .....                                              | 300 |
| HsaSIGLEC16P  | 250 | .....                                              | 300 |
| PtrSIGLEC16   | 250 | .....T.....                                        | 300 |
| HsaSIGLEC11   | 300 | CCAGATGGTCCCGGGACAGGCCAGCCCAGAGCCCAGACATGCTGCTGC   | 350 |
| PtrSIGLEC11   | 300 | .....T.....T                                       | 350 |
| HsaSIGLEC16   | 300 | .....                                              | 350 |
| HsaSIGLEC16P  | 300 | .....                                              | 350 |
| PtrSIGLEC16   | 300 | .....T.....                                        | 350 |
| HsaSIGLEC11   | 350 | TGCCCTGCTGCTG-----CCCGTGTGGGGGCGGGTGAG             | 385 |
| PtrSIGLEC11   | 350 | .A.....T....CTACCCTGCTGCTG...A.....T.....          | 400 |
| HsaSIGLEC16   | 350 | .....                                              | 385 |
| HsaSIGLEC16P  | 350 | .....                                              | 385 |
| PtrSIGLEC16   | 350 | .....T.....                                        | 385 |
| HsaSIGLEC11   | 385 | TGGGTCGGTGGCTGGGGTCCCAGGCAGGGGCTGGGGCTGCCGCTGAGCC  | 435 |
| PtrSIGLEC11   | 400 | .....                                              | 450 |
| HsaSIGLEC16   | 385 | .....                                              | 435 |
| HsaSIGLEC16P  | 385 | .....                                              | 435 |
| PtrSIGLEC16   | 385 | .....                                              | 435 |
| <u>Exon 2</u> |     |                                                    |     |
| HsaSIGLEC11   | 435 | TCTGCATCTCCCAGGGTCCCCTGAACAAGGATCCCAGTTACAGTCTTCAA | 485 |
| PtrSIGLEC11   | 450 | .....                                              | 500 |
| HsaSIGLEC16   | 435 | .....                                              | 485 |
| HsaSIGLEC16P  | 435 | .....                                              | 485 |
| PtrSIGLEC16   | 435 | .....                                              | 485 |

|              |     |                                                            |      |
|--------------|-----|------------------------------------------------------------|------|
| HsaSIGLEC11  | 485 | <u>GTGCAGAGGCAGGTGCCGGTGCCGAGGGCCTGTGTGCATCGTGTCTTG</u>    | 535  |
| PtrSIGLEC11  | 500 | .....A.....C.....                                          | 550  |
| HsaSIGLEC16  | 485 | .....                                                      | 535  |
| HsaSIGLEC16P | 485 | .....                                                      | 535  |
| PtrSIGLEC16  | 485 | .....T.....                                                | 535  |
|              |     |                                                            |      |
| HsaSIGLEC11  | 535 | <u>CAACCTCTCCTACCCCGGGATGGCTGGGACGAGTCTACTGCTGCTTATG</u>   | 585  |
| PtrSIGLEC11  | 550 | .....                                                      | 600  |
| HsaSIGLEC16  | 535 | .....                                                      | 585  |
| HsaSIGLEC16P | 535 | .....                                                      | 585  |
| PtrSIGLEC16  | 535 | .....                                                      | 585  |
|              |     |                                                            |      |
| HsaSIGLEC11  | 585 | <u>GCTACTGGTTCAAAGGACGGACCAGCCCAAAGACGGGTGCTCCTGTGGCC</u>  | 635  |
| PtrSIGLEC11  | 600 | .....C..T.....                                             | 650  |
| HsaSIGLEC16  | 585 | .....                                                      | 635  |
| HsaSIGLEC16P | 585 | .....T.....                                                | 635  |
| PtrSIGLEC16  | 585 | .....C..T.....                                             | 635  |
|              |     |                                                            |      |
| HsaSIGLEC11  | 635 | <u>ACTAACAACCAGATCGAGAGGTGGAATGAGCACCCGGGACCGATTCCA</u>    | 685  |
| PtrSIGLEC11  | 650 | ..A.....                                                   | 700  |
| HsaSIGLEC16  | 635 | .....C.....                                                | 685  |
| HsaSIGLEC16P | 635 | .....                                                      | 685  |
| PtrSIGLEC16  | 635 | ..A.....                                                   | 685  |
|              |     |                                                            |      |
| HsaSIGLEC11  | 685 | <u>GCTCACTGGGGATCCCGGCAAAGGGAGCTGCTCCTTGGTGATCAGAGACG</u>  | 735  |
| PtrSIGLEC11  | 700 | .....                                                      | 750  |
| HsaSIGLEC16  | 685 | .....                                                      | 735  |
| HsaSIGLEC16P | 685 | .....                                                      | 735  |
| PtrSIGLEC16  | 685 | .....G.....                                                | 735  |
|              |     |                                                            |      |
| HsaSIGLEC11  | 735 | <u>CGCAGAGGGAGGATGAGGCATGGTACTTCTTTTCGGGTGGAGAGAGGAAGC</u> | 785  |
| PtrSIGLEC11  | 750 | .....                                                      | 800  |
| HsaSIGLEC16  | 735 | .....                                                      | 785  |
| HsaSIGLEC16P | 735 | .....                                                      | 785  |
| PtrSIGLEC16  | 735 | .....T.....                                                | 785  |
|              |     |                                                            |      |
| HsaSIGLEC11  | 785 | <u>CGTGTGAGACATAGTTTCCTGAGCAATGCGTTCTTTCTAAAAGTAACAGG</u>  | 835  |
| PtrSIGLEC11  | 800 | .....C..A.....                                             | 850  |
| HsaSIGLEC16  | 785 | .....                                                      | 835  |
| HsaSIGLEC16P | 785 | .....G..A...TT.....                                        | 831  |
| PtrSIGLEC16  | 785 | TA.....T..A...A...A...G.....                               | 835  |
|              |     |                                                            |      |
| HsaSIGLEC11  | 835 | <u>TATGGAATGGGGTGGGAACCCCTGCCTGTACACTGGGGAGGGACCCCTGG</u>  | 885  |
| PtrSIGLEC11  | 850 | .....                                                      | 900  |
| HsaSIGLEC16  | 835 | .....                                                      | 885  |
| HsaSIGLEC16P | 831 | .....                                                      | 881  |
| PtrSIGLEC16  | 835 | .....                                                      | 885  |
|              |     |                                                            |      |
| HsaSIGLEC11  | 885 | <u>GGACAGGCTATGGGCTGAGCAGAGAGGGCTCTCAGGGACCCCTGCAGCAC</u>  | 935  |
| PtrSIGLEC11  | 900 | .....                                                      | 950  |
| HsaSIGLEC16  | 885 | .....T.....                                                | 935  |
| HsaSIGLEC16P | 881 | .....T.....                                                | 931  |
| PtrSIGLEC16  | 885 | .....                                                      | 935  |
|              |     |                                                            |      |
| HsaSIGLEC11  | 935 | <u>AAGAATCTCCCACC-CGGTCTCTGTCCCAGCCCTGACTAAGAAGCCTGAT</u>  | 984  |
| PtrSIGLEC11  | 950 | .....TC.....C.....C.....                                   | 1000 |
| HsaSIGLEC16  | 935 | .....C.....                                                | 984  |
| HsaSIGLEC16P | 931 | .....TC.....C.....C.....                                   | 981  |
| PtrSIGLEC16  | 935 | .....TC.....C.....C.....                                   | 985  |

A/A'1

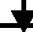

Exon 3 A/A'2

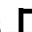

|              |      |                                                            |      |
|--------------|------|------------------------------------------------------------|------|
| HsaSIGLEC11  | 984  | <u>GTCTACATCCCCGAGACCCCTGGAGCCCGGCAGCCGGTGACGGTCATCTG</u>  | 1034 |
| PtrSIGLEC11  | 1000 | .....A.....                                                | 1050 |
| HsaSIGLEC16  | 984  | .....                                                      | 1034 |
| HsaSIGLEC16P | 981  | .....                                                      | 1031 |
| PtrSIGLEC16  | 985  | .....C.....                                                | 1035 |
|              |      |                                                            |      |
| HsaSIGLEC11  | 1034 | <u>TGTGTTTAACTGGGCTTTCAAGAAATGTCCAGCCCTTCTTTCTCCTGGA</u>   | 1084 |
| PtrSIGLEC11  | 1050 | .....                                                      | 1100 |
| HsaSIGLEC16  | 1034 | .....                                                      | 1084 |
| HsaSIGLEC16P | 1031 | .....                                                      | 1081 |
| PtrSIGLEC16  | 1035 | .....                                                      | 1085 |
|              |      |                                                            |      |
| HsaSIGLEC11  | 1084 | <u>CGGGGGCTGCCCTCTCCCTAGAGAACCAGACCAAGCACCTCCCCTTC</u>     | 1134 |
| PtrSIGLEC11  | 1100 | .....C.....                                                | 1150 |
| HsaSIGLEC16  | 1084 | .....                                                      | 1134 |
| HsaSIGLEC16P | 1081 | .....                                                      | 1131 |
| PtrSIGLEC16  | 1085 | .....C.....                                                | 1135 |
|              |      |                                                            |      |
| HsaSIGLEC11  | 1134 | <u>TCAGTGCTCAGCTTCACGCCAGCCCCAGGACCACGACCCGACCTCAC</u>     | 1184 |
| PtrSIGLEC11  | 1150 | .....G.....A.....                                          | 1200 |
| HsaSIGLEC16  | 1134 | .....                                                      | 1184 |
| HsaSIGLEC16P | 1131 | .....                                                      | 1181 |
| PtrSIGLEC16  | 1135 | .....A.....                                                | 1185 |
|              |      |                                                            |      |
| HsaSIGLEC11  | 1184 | <u>CTGCCATGTGGACTTCTCCAGAAAGGGTGTGAGCGCACAGAGGACCGTCC</u>  | 1234 |
| PtrSIGLEC11  | 1200 | .....                                                      | 1250 |
| HsaSIGLEC16  | 1184 | .....                                                      | 1234 |
| HsaSIGLEC16P | 1181 | .....                                                      | 1231 |
| PtrSIGLEC16  | 1185 | .....G.....                                                | 1235 |
|              |      |                                                            |      |
| HsaSIGLEC11  | 1234 | <u>GACTCCGTGTGGCCTGTGAGTGTGGCCTGGGAGGGTGGGGCGTGACAGACA</u> | 1284 |
| PtrSIGLEC11  | 1250 | .....                                                      | 1300 |
| HsaSIGLEC16  | 1234 | .....                                                      | 1284 |
| HsaSIGLEC16P | 1231 | .....                                                      | 1281 |
| PtrSIGLEC16  | 1235 | .....T.....                                                | 1285 |
|              |      |                                                            |      |
| HsaSIGLEC11  | 1284 | <u>GCCCCGGTGGGTGGGGAGGTGGAGGAGCCAGCGGGACAGTGAGTGGCTC</u>   | 1334 |
| PtrSIGLEC11  | 1300 | .....C.....                                                | 1350 |
| HsaSIGLEC16  | 1284 | .....                                                      | 1334 |
| HsaSIGLEC16P | 1281 | .....A.....                                                | 1331 |
| PtrSIGLEC16  | 1285 | .....CT.....                                               | 1335 |
|              |      |                                                            |      |
| HsaSIGLEC11  | 1334 | <u>CCAGCTCAGGAGCATCCAGGGAGAGGAAGCTGTGGGGTCCCAGGATGCCG</u>  | 1384 |
| PtrSIGLEC11  | 1350 | .....                                                      | 1400 |
| HsaSIGLEC16  | 1334 | .....                                                      | 1384 |
| HsaSIGLEC16P | 1331 | .....                                                      | 1381 |
| PtrSIGLEC16  | 1335 | .....C.....                                                | 1385 |
|              |      |                                                            |      |
| HsaSIGLEC11  | 1384 | <u>GCTCAGCCCTGGGAGGGGGATGGGAATGGCGTCTGATCCTCTGTCCACAT</u>  | 1434 |
| PtrSIGLEC11  | 1400 | .....                                                      | 1450 |
| HsaSIGLEC16  | 1384 | .....                                                      | 1434 |
| HsaSIGLEC16P | 1381 | .....                                                      | 1431 |
| PtrSIGLEC16  | 1385 | .....                                                      | 1435 |
|              |      |                                                            |      |
| HsaSIGLEC11  | 1434 | <u>GTGTGAGCCCTGGAGCTGGTTGTCACTTGTCCATCCTGGGATGTTCCAC</u>   | 1484 |
| PtrSIGLEC11  | 1450 | .....T.....                                                | 1500 |
| HsaSIGLEC16  | 1434 | .....T.....                                                | 1484 |
| HsaSIGLEC16P | 1431 | .....                                                      | 1481 |
| PtrSIGLEC16  | 1435 | .....                                                      | 1485 |

|              |      |                                                    |      |
|--------------|------|----------------------------------------------------|------|
| HsaSIGLEC11  | 1484 | TTTCTTTTCCCTGAGGGAGTTTTTTCCAGGTGTGAGGAACAAATTGTCCC | 1534 |
| PtrSIGLEC11  | 1500 | .....AC.....                                       | 1550 |
| HsaSIGLEC16  | 1484 | .....                                              | 1534 |
| HsaSIGLEC16P | 1481 | .....                                              | 1531 |
| PtrSIGLEC16  | 1485 | .....AC.....                                       | 1535 |

Exon 4

|              |      |                                                   |      |
|--------------|------|---------------------------------------------------|------|
| HsaSIGLEC11  | 1534 | TCCCTGAAGCCAGCTCACAACTTGTGTCAGATGCCCCCAAAGACCTTAT | 1584 |
| PtrSIGLEC11  | 1550 | .....C.....                                       | 1600 |
| HsaSIGLEC16  | 1534 | .....                                             | 1584 |
| HsaSIGLEC16P | 1531 | .....                                             | 1581 |
| PtrSIGLEC16  | 1535 | .....C.....                                       | 1585 |

|              |      |                                                   |      |
|--------------|------|---------------------------------------------------|------|
| HsaSIGLEC11  | 1584 | TATCAGCATTTACATGACAACACGTCAGGTACTGAGGGCCTTCGGGCTG | 1634 |
| PtrSIGLEC11  | 1600 | .....T.A                                          | 1650 |
| HsaSIGLEC16  | 1584 | .....G.....A...T.....                             | 1634 |
| HsaSIGLEC16P | 1581 | .....                                             | 1631 |
| PtrSIGLEC16  | 1585 | .....T.....                                       | 1635 |

|              |      |                                                   |      |
|--------------|------|---------------------------------------------------|------|
| HsaSIGLEC11  | 1634 | GGGCTGGGCCAGTCCTCTTTAGGGATGAAAAGGCTTCAGGGGGTGAGGG | 1684 |
| PtrSIGLEC11  | 1650 | .....A.....                                       | 1700 |
| HsaSIGLEC16  | 1634 | .....                                             | 1684 |
| HsaSIGLEC16P | 1631 | .....                                             | 1681 |
| PtrSIGLEC16  | 1635 | .....                                             | 1685 |

|              |      |                                                 |      |
|--------------|------|-------------------------------------------------|------|
| HsaSIGLEC11  | 1684 | GATGTGGTCCTCTTTGCAGCCCCCTCCACCCATTCTCTCTCTCCACC | 1734 |
| PtrSIGLEC11  | 1700 | .G.....-----                                    | 1745 |
| HsaSIGLEC16  | 1684 | .....--C..A.....                                | 1732 |
| HsaSIGLEC16P | 1681 | .....                                           | 1731 |
| PtrSIGLEC16  | 1685 | .....G--.....                                   | 1733 |

Exon 5

|              |      |                                                   |      |
|--------------|------|---------------------------------------------------|------|
| HsaSIGLEC11  | 1734 | CCCACCTCTCTCTTTCCCTGTCTTCAGCCCTGGAACCTCCAGGAAACGT | 1784 |
| PtrSIGLEC11  | 1745 | .....A.....                                       | 1795 |
| HsaSIGLEC16  | 1732 | .....C.....                                       | 1782 |
| HsaSIGLEC16P | 1731 | .....                                             | 1781 |
| PtrSIGLEC16  | 1733 | .....C.....                                       | 1783 |

|              |      |                                                    |      |
|--------------|------|----------------------------------------------------|------|
| HsaSIGLEC11  | 1784 | CATATATCTGGAAGTTCAGAAAGGCCAGTTCCTGCGGCTCCTCTGTGCTG | 1834 |
| PtrSIGLEC11  | 1795 | ...G.....                                          | 1845 |
| HsaSIGLEC16  | 1782 | .....                                              | 1832 |
| HsaSIGLEC16P | 1781 | .....                                              | 1831 |
| PtrSIGLEC16  | 1783 | .....                                              | 1833 |

|              |      |                                                   |      |
|--------------|------|---------------------------------------------------|------|
| HsaSIGLEC11  | 1834 | CTGACAGCCAGCCCCCTGCCACGCTGAGCTGGGTCTGCAGGACAGAGTC | 1884 |
| PtrSIGLEC11  | 1845 | .....A.....                                       | 1895 |
| HsaSIGLEC16  | 1832 | .....                                             | 1882 |
| HsaSIGLEC16P | 1831 | .....                                             | 1881 |
| PtrSIGLEC16  | 1833 | .....A.....                                       | 1883 |

|              |      |                                                  |      |
|--------------|------|--------------------------------------------------|------|
| HsaSIGLEC11  | 1884 | CTCTCCTCGTCCCACCCTGGGGCCCCAGAACCTGGGGCTGGAGCTGCG | 1934 |
| PtrSIGLEC11  | 1895 | .....C                                           | 1945 |
| HsaSIGLEC16  | 1882 | .....C                                           | 1932 |
| HsaSIGLEC16P | 1881 | .....                                            | 1931 |
| PtrSIGLEC16  | 1883 | .....C                                           | 1933 |

|              |      |                                                    |      |
|--------------|------|----------------------------------------------------|------|
| HsaSIGLEC11  | 1934 | TGGGGTAAGGGCCGGGATTTCAGGGCGCTACACCTGCCGAGCGGAGAACA | 1984 |
| PtrSIGLEC11  | 1945 | C..A..G.A...T.....                                 | 1995 |
| HsaSIGLEC16  | 1932 | C..A..G.A...T.....                                 | 1982 |
| HsaSIGLEC16P | 1931 | .....                                              | 1981 |
| PtrSIGLEC16  | 1933 | C..A..G.A...T.....                                 | 1983 |

|              |      |                                                           |      |
|--------------|------|-----------------------------------------------------------|------|
| HsaSIGLEC11  | 1984 | <u>GGCTTGGCTCCCAGCAGCAAGCCCTGGACCTCTCTGTGCAGTGTGAGTGT</u> | 2034 |
| PtrSIGLEC11  | 1995 | .....G.....                                               | 2045 |
| HsaSIGLEC16  | 1982 | .....G.....                                               | 2032 |
| HsaSIGLEC16P | 1981 | .....G.....                                               | 2031 |
| PtrSIGLEC16  | 1983 | .....T.....G.....                                         | 2033 |

|              |      |                                                  |      |
|--------------|------|--------------------------------------------------|------|
| HsaSIGLEC11  | 2034 | GCCTAGCAGGGGCTGGAGTCCATTGGGAGGGCAGGGGATACAGGGGCT | 2084 |
| PtrSIGLEC11  | 2045 | ...C.....                                        | 2095 |
| HsaSIGLEC16  | 2032 | .....C.....                                      | 2082 |
| HsaSIGLEC16P | 2031 | .....                                            | 2081 |
| PtrSIGLEC16  | 2033 | ...C.....                                        | 2083 |

|              |      |                                                   |      |
|--------------|------|---------------------------------------------------|------|
| HsaSIGLEC11  | 2084 | GGGCTCAGGGTCCCAGAGCTGAGGGGTCTTGAACCCAGGCCCTCGGGGA | 2134 |
| PtrSIGLEC11  | 2095 | .....AC.AA.G.....T..A....                         | 2145 |
| HsaSIGLEC16  | 2082 | .....T.....                                       | 2132 |
| HsaSIGLEC16P | 2081 | .....T.....                                       | 2131 |
| PtrSIGLEC16  | 2083 | .....                                             | 2133 |

|              |      |                                                    |      |
|--------------|------|----------------------------------------------------|------|
| HsaSIGLEC11  | 2134 | CTGACCTTCTTACCTGTGTAGACCCTCATGCAGTTTGTGTCTGGGACTCA | 2184 |
| PtrSIGLEC11  | 2145 | ....TA.....                                        | 2195 |
| HsaSIGLEC16  | 2132 | .....                                              | 2182 |
| HsaSIGLEC16P | 2131 | .....                                              | 2181 |
| PtrSIGLEC16  | 2133 | .....                                              | 2183 |

A/A'2    T    B/B'

↓

|              |      |                                                     |      |
|--------------|------|-----------------------------------------------------|------|
| HsaSIGLEC11  | 2184 | GTGGGTGATTCTGCCCCTGCCCTTCTATCCCACCCACTTCCCCCACCTCAG | 2234 |
| PtrSIGLEC11  | 2195 | .....A.....                                         | 2245 |
| HsaSIGLEC16  | 2182 | .....                                               | 2232 |
| HsaSIGLEC16P | 2181 | .....                                               | 2231 |
| PtrSIGLEC16  | 2183 | .....A.....                                         | 2233 |

|              |      |                                                   |      |
|--------------|------|---------------------------------------------------|------|
| HsaSIGLEC11  | 2234 | TGTCCAGGATAGTTCCTTTACCCAGAGGGAAGCCCCTGGTCTGTCTAGA | 2284 |
| PtrSIGLEC11  | 2245 | .....G.....G.....T.....CA.....                    | 2295 |
| HsaSIGLEC16  | 2232 | .C.....CGC.....G.....T.....C.....                 | 2282 |
| HsaSIGLEC16P | 2231 | .C.....CGC.....G.....T.....C.....                 | 2281 |
| PtrSIGLEC16  | 2233 | .....CGC.....G.....C.....T.....C.....             | 2283 |

Exon 6

|              |      |                                                            |      |
|--------------|------|------------------------------------------------------------|------|
| HsaSIGLEC11  | 2284 | <u>GCCGGTCCCCTGTCTCCATTTTCAGATCCTCCAGAGAACCTGAGAGTGATG</u> | 2334 |
| PtrSIGLEC11  | 2295 | .....                                                      | 2345 |
| HsaSIGLEC16  | 2282 | .....                                                      | 2332 |
| HsaSIGLEC16P | 2281 | .....                                                      | 2331 |
| PtrSIGLEC16  | 2283 | .....                                                      | 2333 |

|              |      |                                                          |      |
|--------------|------|----------------------------------------------------------|------|
| HsaSIGLEC11  | 2334 | <u>GTTTCCAAGCAAACAGGACAGGTAGGAAAGGAGACAGAGGAGCCAGGGC</u> | 2384 |
| PtrSIGLEC11  | 2345 | .....                                                    | 2395 |
| HsaSIGLEC16  | 2332 | .....                                                    | 2382 |
| HsaSIGLEC16P | 2331 | .....                                                    | 2381 |
| PtrSIGLEC16  | 2333 | .....                                                    | 2383 |

|              |      |                                                   |      |
|--------------|------|---------------------------------------------------|------|
| HsaSIGLEC11  | 2384 | CTCTCAGTGCCAAACTGGGGGCCAGGAGTCTGGAGGGTCCCCACACAGG | 2434 |
| PtrSIGLEC11  | 2395 | .....T.....T.....G.....                           | 2445 |
| HsaSIGLEC16  | 2382 | .....T.A.....T.....TG....                         | 2432 |
| HsaSIGLEC16P | 2381 | .....T.....T.....TG....                           | 2431 |
| PtrSIGLEC16  | 2383 | .....T.....T.....G....                            | 2433 |

|              |      |                                                    |      |
|--------------|------|----------------------------------------------------|------|
| HsaSIGLEC11  | 2434 | AGGGTCCCTGAGCCCTGAGCTGCACGTCGATTCTGCCTCTCTCCTCCCTA | 2484 |
| PtrSIGLEC11  | 2445 | C.....C...A.....                                   | 2495 |
| HsaSIGLEC16  | 2432 | C.....AAT.....                                     | 2482 |
| HsaSIGLEC16P | 2431 | C.....                                             | 2481 |
| PtrSIGLEC16  | 2433 | C.....AAT.....                                     | 2483 |

### Exon 7

|              |      |                                                          |      |
|--------------|------|----------------------------------------------------------|------|
| HsaSIGLEC11  | 2484 | <u>GTCCTGGAAAACCTCGGGAACGGCACATCCCTCCCGGTCTGGAGGGCCA</u> | 2534 |
| PtrSIGLEC11  | 2495 | .....A.....                                              | 2545 |
| HsaSIGLEC16  | 2482 | .....A.....G.....                                        | 2532 |
| HsaSIGLEC16P | 2481 | .....GA.....G.....                                       | 2531 |
| PtrSIGLEC16  | 2483 | .....G.....                                              | 2533 |
|              |      |                                                          |      |
| HsaSIGLEC11  | 2534 | <u>AAGCCTGCGCCTGGTCTGTGTACCCACAGCAGCCCCCAGCCAGGCTGA</u>  | 2584 |
| PtrSIGLEC11  | 2545 | .....A.....                                              | 2595 |
| HsaSIGLEC16  | 2532 | .....T.....                                              | 2582 |
| HsaSIGLEC16P | 2531 | .....T.....A.....                                        | 2581 |
| PtrSIGLEC16  | 2533 | .....                                                    | 2583 |
|              |      |                                                          |      |
| HsaSIGLEC11  | 2584 | <u>GCTGGACCCGGTGGGGACAGACCGTGGGCCCTCCAGCCCTCAGACCC</u>   | 2634 |
| PtrSIGLEC11  | 2595 | .....                                                    | 2645 |
| HsaSIGLEC16  | 2582 | .....T..G..A.....T                                       | 2632 |
| HsaSIGLEC16P | 2581 | .....T                                                   | 2631 |
| PtrSIGLEC16  | 2583 | .....T..G..A.....T                                       | 2633 |
|              |      |                                                          |      |
| HsaSIGLEC11  | 2634 | <u>GGGGTCCTGGAGCTGCCACCCATTCAAATGGAGCACGAAGGAGATTAC</u>  | 2684 |
| PtrSIGLEC11  | 2645 | .....A.....                                              | 2695 |
| HsaSIGLEC16  | 2632 | .....C.....T.GGG.....                                    | 2682 |
| HsaSIGLEC16P | 2631 | .....T.GGG.....                                          | 2681 |
| PtrSIGLEC16  | 2633 | .....T.GGG.....                                          | 2683 |
|              |      |                                                          |      |
| HsaSIGLEC11  | 2684 | <u>CTGCCACGCTCAGCACCTCTGGGCTCCAGCACGTCTCTCAGCCTCT</u>    | 2734 |
| PtrSIGLEC11  | 2695 | .....                                                    | 2745 |
| HsaSIGLEC16  | 2682 | .....G.....G.....G.....T...                              | 2732 |
| HsaSIGLEC16P | 2681 | .....G.....G.....G.....T...                              | 2731 |
| PtrSIGLEC16  | 2683 | ...T...TG...G.....G.....T...                             | 2733 |
|              |      |                                                          |      |
| HsaSIGLEC11  | 2734 | <u>CCGTGCACTGTGAGTGGGGAAAGGGGACACCTGGGTCCAGGAAGGGG-</u>  | 2783 |
| PtrSIGLEC11  | 2745 | .....-                                                   | 2794 |
| HsaSIGLEC16  | 2732 | .....-                                                   | 2780 |
| HsaSIGLEC16P | 2731 | .....-                                                   | 2779 |
| PtrSIGLEC16  | 2733 | .....G                                                   | 2782 |

### Exon 8

|              |      |                                                          |      |
|--------------|------|----------------------------------------------------------|------|
| HsaSIGLEC11  | 2783 | <u>CCCCTGCTGAGTCTGTCTCCCTCCCCACAGACCCTCCACAGCTGCTGG</u>  | 2833 |
| PtrSIGLEC11  | 2794 | .....T.....                                              | 2844 |
| HsaSIGLEC16  | 2780 | .....-.....G..C..C.....                                  | 2829 |
| HsaSIGLEC16P | 2779 | .....-.....G..C..C.....                                  | 2828 |
| PtrSIGLEC16  | 2782 | .....-.....G..C..C.....                                  | 2831 |
|              |      |                                                          |      |
| HsaSIGLEC11  | 2833 | <u>GCCCCTCCTGCTCCTGGGAGGCTGAGGGTCTGCACTGCAGCTGCTCCTC</u> | 2883 |
| PtrSIGLEC11  | 2844 | .....G.....                                              | 2894 |
| HsaSIGLEC16  | 2829 | .A.....A.....A.....                                      | 2879 |
| HsaSIGLEC16P | 2828 | .A.....                                                  | 2878 |
| PtrSIGLEC16  | 2831 | .A.....A.....A.....                                      | 2881 |
|              |      |                                                          |      |
| HsaSIGLEC11  | 2883 | <u>CAGGCCAGCCCGGCCCTCTCTGCGCTGGTGGCTTGGGGAGGAGCTGCT</u>  | 2933 |
| PtrSIGLEC11  | 2894 | .....                                                    | 2944 |
| HsaSIGLEC16  | 2879 | ..A.G.....G.....C.....A...T.G.....-                      | 2928 |
| HsaSIGLEC16P | 2878 | ..A.G.....G.....C.....A...T.G.....-                      | 2927 |
| PtrSIGLEC16  | 2881 | ..A.G.....A.....G.....C.....A...T.G.....-                | 2930 |
|              |      |                                                          |      |
| HsaSIGLEC11  | 2933 | <u>GGAGGGGAACAGCAGTCAGGGCTCCTTCGAGGTACCCCCAGCTCAGCCG</u> | 2983 |
| PtrSIGLEC11  | 2944 | .....T.....                                              | 2994 |
| HsaSIGLEC16  | 2928 | .....A.....C...A..A...A.....                             | 2978 |
| HsaSIGLEC16P | 2927 | .....A.....C...A..A...A.....                             | 2977 |
| PtrSIGLEC16  | 2930 | ..A.....C...A..A...A.....                                | 2980 |

|              |      |                                                           |      |
|--------------|------|-----------------------------------------------------------|------|
| HsaSIGLEC11  | 2983 | <u>GGCCCTGGGCCAACAGCTCCCTGAGCCTCCATGGAGGG-CTCAGCTCCGG</u> | 3032 |
| PtrSIGLEC11  | 2994 | .....-.....                                               | 3043 |
| HsaSIGLEC16  | 2978 | .....T.....A..G..G..TG....AA                              | 3028 |
| HsaSIGLEC16P | 2977 | .....T.....A..G..G..TG....AA                              | 3027 |
| PtrSIGLEC16  | 2980 | .....T.....A..G..G..TG....AA                              | 3030 |
|              |      |                                                           |      |
| HsaSIGLEC11  | 3032 | <u>CCTCAGGCTCCGCTGTAAGGCCTGGAACGTCCACGGGGCCAGAG</u>       | 3077 |
| PtrSIGLEC11  | 3043 | .....A.....G.....T.....                                   | 3088 |
| HsaSIGLEC16  | 3028 | .....AC..T.G....CA.....T.....                             | 3073 |
| HsaSIGLEC16P | 3027 | .....AC..T.G....CA.....T.....                             | 3072 |
| PtrSIGLEC16  | 3030 | .....AC..T.G....CA.....T.....                             | 3075 |

Figure S2 Wang et al.

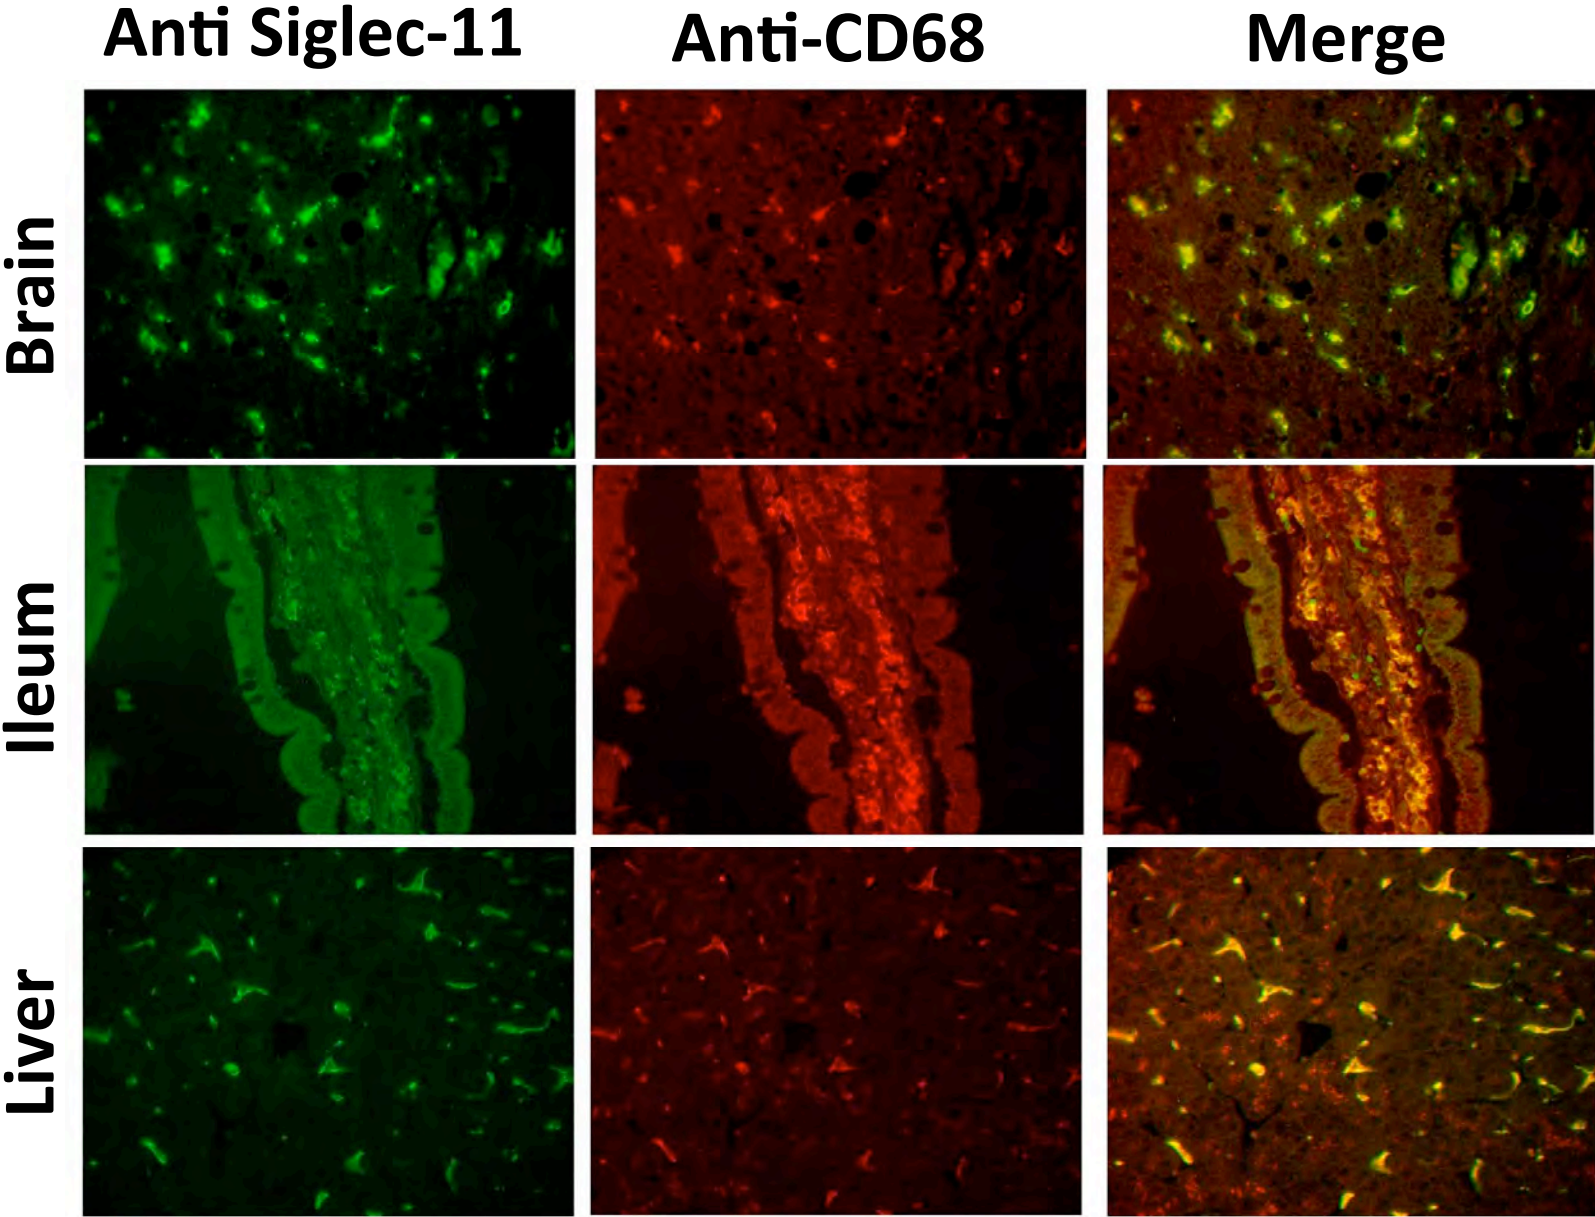

1



Figure S3 Wang et al.

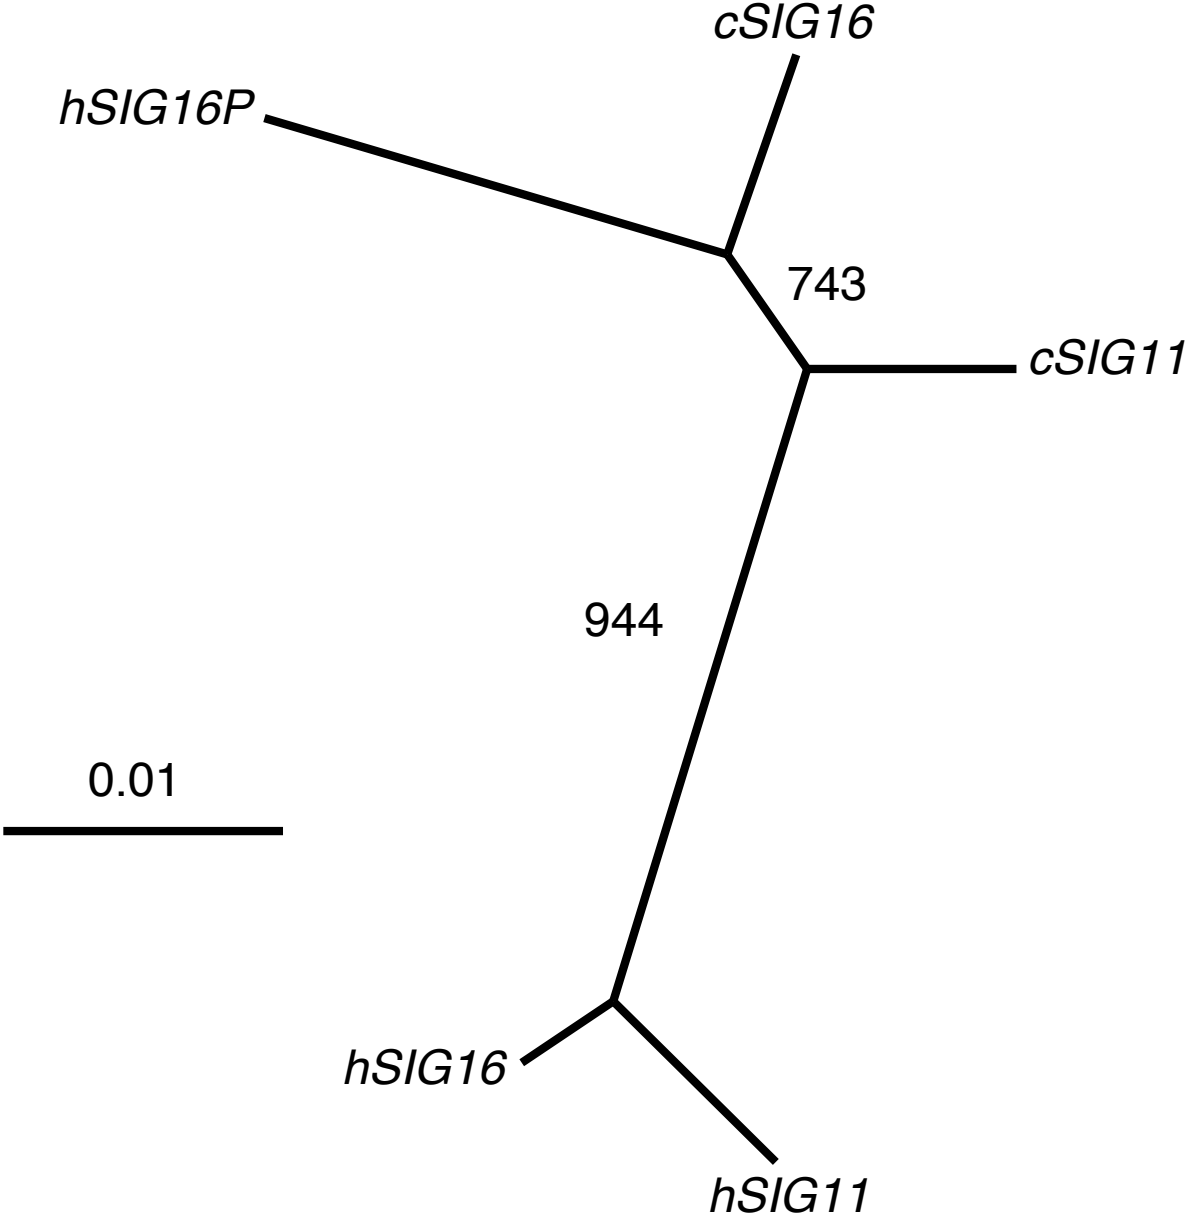



---

|             |            |            |            |            |            |            |
|-------------|------------|------------|------------|------------|------------|------------|
| HsaSIGLEC11 | AGGACGGACC | AGCCCAAAGA | CGGGTGCTCC | TGTGGCCACT | AACAACCAGA | GTCGAGAGGT |
| Denisovan   | .....      | .....      | .....      | .....      | .....      | .....      |
| PtrSIGLEC11 | .C..T..... | .....      | .....      | .....A     | .....      | .....      |

---

|             |            |            |            |            |            |            |
|-------------|------------|------------|------------|------------|------------|------------|
| HsaSIGLEC11 | GGAAATGAGC | ACCCGGGACC | GATTCCAGCT | CACTGGGGAT | CCCGGCAAAG | GGAGCTGCTC |
| Denisovan   | .....      | .....      | .....      | .....      | .....      | .....      |
| PtrSIGLEC11 | .....      | .....      | .....      | .....      | .....      | .....      |

---

|             |            |            |            |            |            |            |
|-------------|------------|------------|------------|------------|------------|------------|
| HsaSIGLEC11 | CTTGGTGATC | AGAGACGCGC | AGAGGGAGGA | TGAGGCATGG | TACTTCTTTC | GGGTGGAGAG |
| Denisovan   | .....      | .....      | .....      | .....      | .....      | .....      |
| PtrSIGLEC11 | .....      | .....      | .....      | .....      | .....      | .....      |

---

|             |            |            |            |            |            |            |
|-------------|------------|------------|------------|------------|------------|------------|
| HsaSIGLEC11 | AGGAAGCCGT | GTGAGACATA | GTTTCCTGAG | CAATGCGTTC | TTTCTAAAAG | TAACAGGTAT |
| Denisovan   | .....      | .....      | .....      | .....      | .....      | .....      |
| PtrSIGLEC11 | .....      | .....      | .....C..A  | .....      | .....      | .....      |

---

|             |            |            |            |            |            |            |
|-------------|------------|------------|------------|------------|------------|------------|
| HsaSIGLEC11 | GGAATGGGGT | GGGAACCCCT | GCCTGTCACA | CTGGGGAGGG | ACCCTGGGGA | CAGGCTATGG |
| Denisovan   | .....      | .....      | .....      | .....      | .....      | .....      |
| PtrSIGLEC11 | .....      | .....      | .....      | .....      | .....      | .....      |

---

|             |            |            |            |            |           |             |
|-------------|------------|------------|------------|------------|-----------|-------------|
| HsaSIGLEC11 | GCTGAGCAGA | GAGGGCTCTC | AGGGACCCCT | GCAGCACAAG | AATCTCCAC | C-CGGTCTCT  |
| Denisovan   | .....      | .....      | .....      | .....      | .....     | .....       |
| PtrSIGLEC11 | .....      | .....      | .....      | .....      | .....TC   | .....C..... |

### Exon 3

---

|             |         |         |            |            |            |            |             |
|-------------|---------|---------|------------|------------|------------|------------|-------------|
| HsaSIGLEC11 | GTC     | CCAGCCC | TGACTAAGAA | GCCTGATGTC | TACATCCCCG | AGACCCTGGA | GCCCGGGCAG  |
| Denisovan   | .....   | .....   | .....      | .....      | .....      | .....      | .....       |
| PtrSIGLEC11 | .C..... | .....C  | .....      | .....      | .....      | .....      | .....A..... |

---

|             |            |            |            |            |            |            |
|-------------|------------|------------|------------|------------|------------|------------|
| HsaSIGLEC11 | CCGGTGACGG | TCATCTGTGT | GTTTAACTGG | GCTTTCAAGA | AATGTCCAGC | CCCTTCTTTC |
| Denisovan   | ..A.....   | .....      | .....      | .....      | .....--    | -----      |
| PtrSIGLEC11 | .....      | .....      | .....      | .....      | .....      | .....      |

---

|             |            |            |             |            |            |            |
|-------------|------------|------------|-------------|------------|------------|------------|
| HsaSIGLEC11 | TCCTGGACGG | GGGCTGCCCT | CTCCCCTAGA  | AGAACCAGAC | CAAGCACCTC | CCACTTCTCA |
| Denisovan   | -----      | -----      | .....       | .....      | .....      | .....      |
| PtrSIGLEC11 | .....      | .....      | .....C..... | .....      | .....      | .....      |

---

|             |             |             |            |            |            |            |
|-------------|-------------|-------------|------------|------------|------------|------------|
| HsaSIGLEC11 | GTGCTCAGCT  | TCACGCCCAG  | CCCCCAGGAC | CACGACACCG | ACCTCACCTG | CCATGTGGAC |
| Denisovan   | .....       | .....       | .....      | .....      | .....      | .....      |
| PtrSIGLEC11 | .....G..... | .....A..... | .....      | .....      | .....      | .....      |

---

|             |            |            |            |            |            |            |
|-------------|------------|------------|------------|------------|------------|------------|
| HsaSIGLEC11 | TTCTCCAGAA | AGGGTGTGAG | CGCACAGAGG | ACCGTCCGAC | TCCGTGTGGC | CTGTGAGTGT |
| Denisovan   | .....      | .....      | .....      | .....      | .....      | .....      |
| PtrSIGLEC11 | .....      | .....      | .....      | .....      | .....      | .....      |

---

|             |            |            |            |            |            |            |
|-------------|------------|------------|------------|------------|------------|------------|
| HsaSIGLEC11 | GGCCTGGGAG | GGTGGGGCGT | GCAGACAGCC | CCGGTGGGTG | GGGAGGTGGA | GGAGCCCAGC |
| Denisovan   | .....      | .....      | .....      | .....      | .....      | .....      |
| PtrSIGLEC11 | .....      | .....      | .....      | .....      | .....      | .....      |

---

|             |             |             |            |            |            |            |
|-------------|-------------|-------------|------------|------------|------------|------------|
| HsaSIGLEC11 | GGGACAGTGA  | GTGGCTCCCA  | GCTCAGGAGC | ATCCAGGGAG | AGGAAGCTGT | GGGGTCCCAG |
| Denisovan   | .....G..... | .....       | .....      | .....      | .....      | .....      |
| PtrSIGLEC11 | .....       | .....C..... | .....      | .....      | .....      | .....      |

---

|             |            |            |            |            |            |            |
|-------------|------------|------------|------------|------------|------------|------------|
| HsaSIGLEC11 | GATGCCGGCT | CAGCCCTGGG | AGGGGGATGG | GAATGGCGTC | TGATCCTCTG | TCCACATGTG |
| Denisovan   | .....      | .....      | .....      | .....      | .....      | .....      |
| PtrSIGLEC11 | .....      | .....      | .....      | .....      | .....      | .....      |

|             |            |            |            |            |            |            |
|-------------|------------|------------|------------|------------|------------|------------|
| HsaSIGLEC11 | TGAGCCCTGG | AGCTGGTTGT | CACTTGTCCA | TCCTGGGATG | TTCCCACTTT | CTTTTCCCTG |
| Denisovan   | -----      | .....      | .....      | .....      | .....      | .....      |
| PtrSIGLEC11 | .....      | .....      | T.....     | .....      | .....      | .....      |

|             |            |            |            |            |            |            |
|-------------|------------|------------|------------|------------|------------|------------|
| HsaSIGLEC11 | AGGGAGTTTT | TTCCAGGTGT | GAGGAACAAA | TTGTCCCTCC | CTGAAGCCAG | CTCACAATCT |
| Denisovan   | .-----     | -----      | .....      | .....      | .....      | .....      |
| PtrSIGLEC11 | .....      | AC.....    | .....      | .....      | .....      | .....      |

Exon 4

---

|             |            |           |            |           |            |            |
|-------------|------------|-----------|------------|-----------|------------|------------|
| HsaSIGLEC11 | TGTTGCAGAT | GCCCCAAAG | ACCTTATTAT | CAGCATTTC | CATGACAACA | CGTCAGGTAC |
| Denisovan   | .....      | .....     | .....      | .....     | .G.....    | .A.....    |
| PtrSIGLEC11 | C.....     | .....     | .....      | .....     | .....      | .....      |

|             |            |            |            |            |            |            |
|-------------|------------|------------|------------|------------|------------|------------|
| HsaSIGLEC11 | TGAGGGCCTT | CGGGCTGGGG | CTGGGCCAGT | CCTCTTTAGG | GATGAAAAGG | CTTCAGGGGG |
| Denisovan   | .....      | .....      | .....      | .....      | .....      | .....      |
| PtrSIGLEC11 | .....      | T.A.....   | .....      | .....      | A.....     | .....      |

|             |            |            |            |            |            |            |
|-------------|------------|------------|------------|------------|------------|------------|
| HsaSIGLEC11 | GTGAGGGGAT | GTGGTCCTCT | TTGCAGCCCC | CCCTCCCACC | CATTCTCTCT | CTCCACCCCC |
| Denisovan   | .....      | .....      | .....      | ---        | -----      | .....      |
| PtrSIGLEC11 | G.....     | .....      | .....      | ---        | .....      | .....      |

Exon 5

---

|             |            |            |            |            |            |            |
|-------------|------------|------------|------------|------------|------------|------------|
| HsaSIGLEC11 | ACCCTCTCTC | TTTCCCTGTC | TTCAGCCCTG | GAACTCCAGG | GAAACGTCAT | ATATCTGGAA |
| Denisovan   | .....      | .....      | .....      | .....      | .....      | .....      |
| PtrSIGLEC11 | .....      | .....      | .....      | .....      | A.....     | G.....     |

|             |             |            |            |            |            |            |
|-------------|-------------|------------|------------|------------|------------|------------|
| HsaSIGLEC11 | G TTCAGAAAG | GCCAGTTCCT | GCGGCTCCTC | TGTGCTGCTG | ACAGCCAGCC | CCCTGCCACG |
| Denisovan   | .....       | .....      | .....      | .....      | .....      | .....      |
| PtrSIGLEC11 | .....       | .....      | .....      | .....      | .....      | .....      |

---

|             |            |            |            |            |            |            |
|-------------|------------|------------|------------|------------|------------|------------|
| HsaSIGLEC11 | CTGAGCTGGG | TCCTGCAGGA | CAGAGTCCTC | TCCTCGTCCC | ACCCCTGGGG | CCCCAGAACC |
| Denisovan   | .....      | .....      | .-----     | -----      | -----      | ---.....   |
| PtrSIGLEC11 | .....A     | .....      | .....      | .....      | .....      | .....      |

---

|             |            |            |           |           |
|-------------|------------|------------|-----------|-----------|
| HsaSIGLEC11 | CTGGGGCTGG | AGCTGCGTGG | GGTAAGGCC | GGGGATTCA |
| Denisovan   | .....      | .....      | .....     | .....     |
| PtrSIGLEC11 | .....      | .....CC    | A..G.A..T | .....     |
